# Supplementary material
Source: publisher site journal article supplement (https://www.dovepress.com/article/271457)

**Supplementary materials:**

**Experimental Section**

**The traditional formulas for calculating LVFS，EF，SV，EDV， ESV and CO**.

LVFS = (LVIDd- LVIDs)/ LVIDd

EF = (LVIDd3- LVIDs3)/ LVIDd3

EDV= LVIDd3

ESV= LVIDs3

SV= LVIDd3- LVIDs3

CO= HR × SV

**Abbreviations:** LVFS, The left ventricular fractional shortening; EF, ejection fraction; SV, stroke volume; EDV, the Left ventricular volume at the end of diastole; ESV, the Left ventricular volume at the end of systole; CO, Cardiac output; LVIDd, the left ventricular internal dimension at the end of diastole; LVIDs, left ventricular internal dimension at the end of systole; HR, heart rate.

**Results Section**

**Figure S1 (A-D)** Histological changes of cardiac tissue after 21 days of treatment in non-selenium treated (A, C) and selenium treated rats(B, D). There are no obvious abnormalities observed among the groups. Magnification is 400× in A-D. Cardiac cell, muscle fibers and connective tissue were observed.

**Abbreviations:** Cont, control; AgNP, silver nanoparticle; Se, selenium.

**Figure 1S**


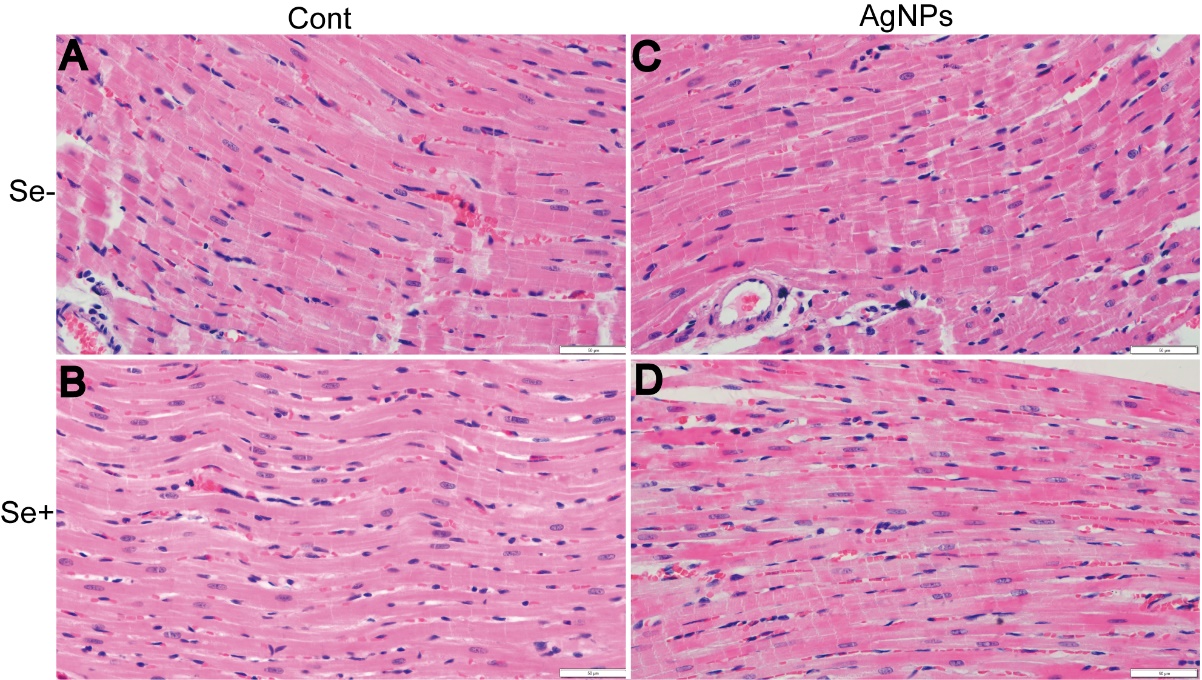

Supplement: Supplementary file 1 [file get_supplementary_file.php]
